# Supplementary material for: Humic surface waters of frozen peat bogs (permafrost zone) are highly resistant to bio- and photodegradation
Source: Copernicus journal article supplement (doi:10.5194/bg-2018-528), 2019-01-14
Supplement: Supplementary file 1 [file bg-2018-528-supplement.pdf]

# Supplementary Information

1  
2  
3  
4  
5  
6

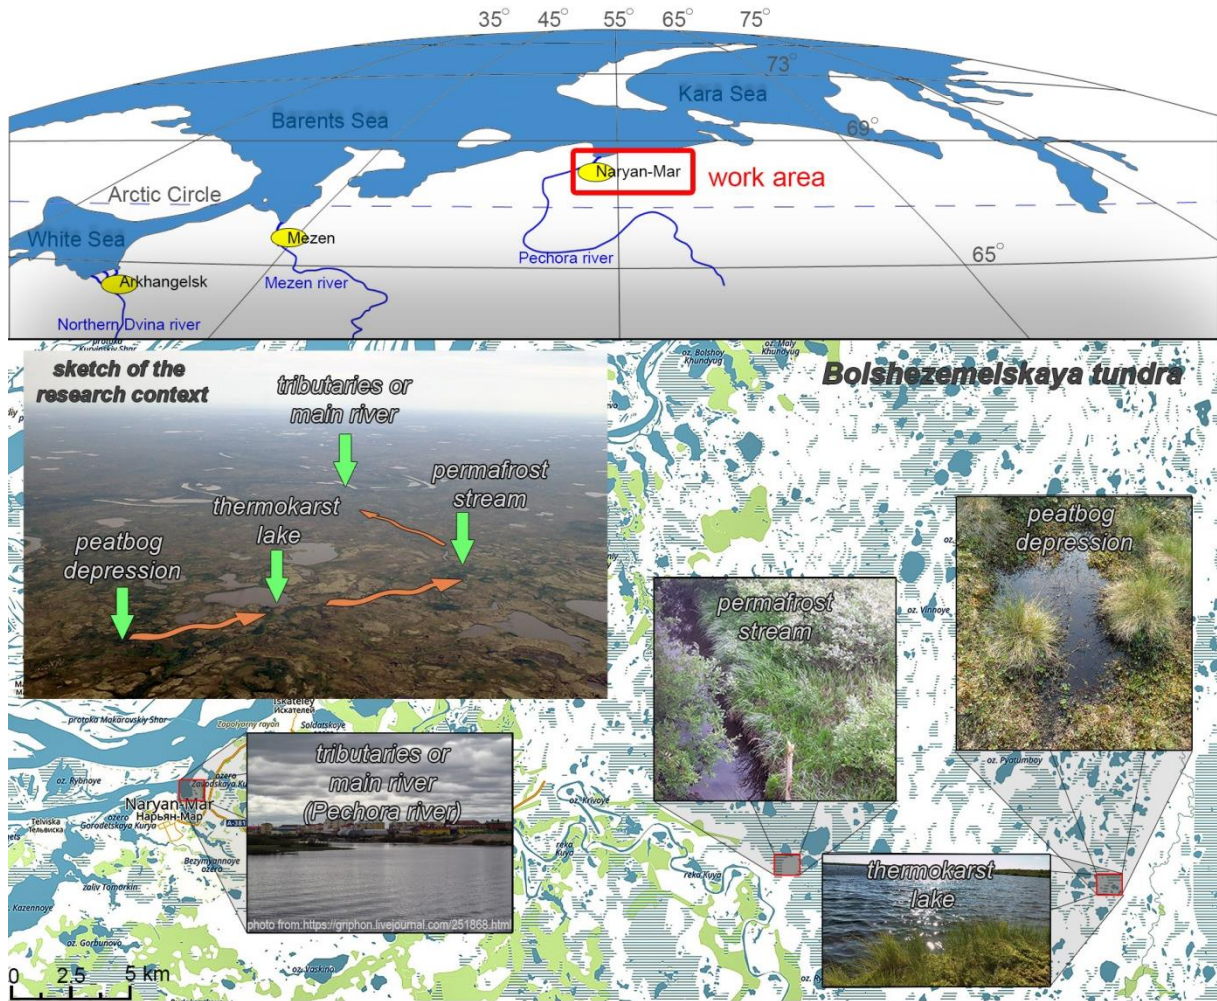

7  
8  
9  
10  
11  
12  
13  
14  
15  
16  
17  
18  
19

**Fig. S1.** The map of studied hydrological continuum and ground photos of sampled aquatic systems.

20  
21  
22  
23  
24  
25

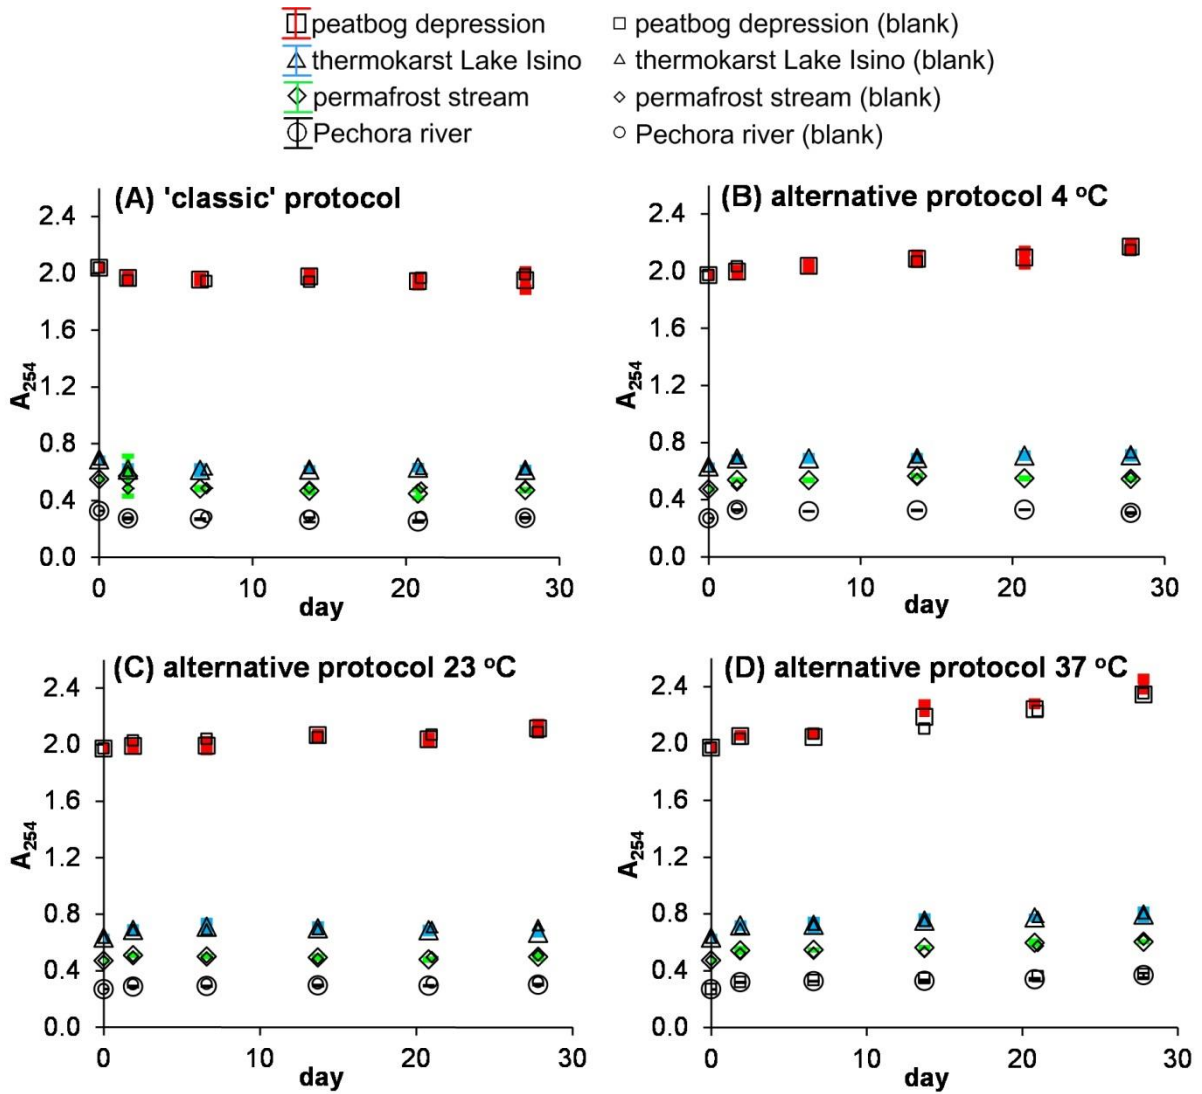

26  
27  
28  
29  
30  
31

**Fig. S2.** UV absorbency at 254 nm in biodegradation experiments. The error bars are 1 s.d. of triplicates.

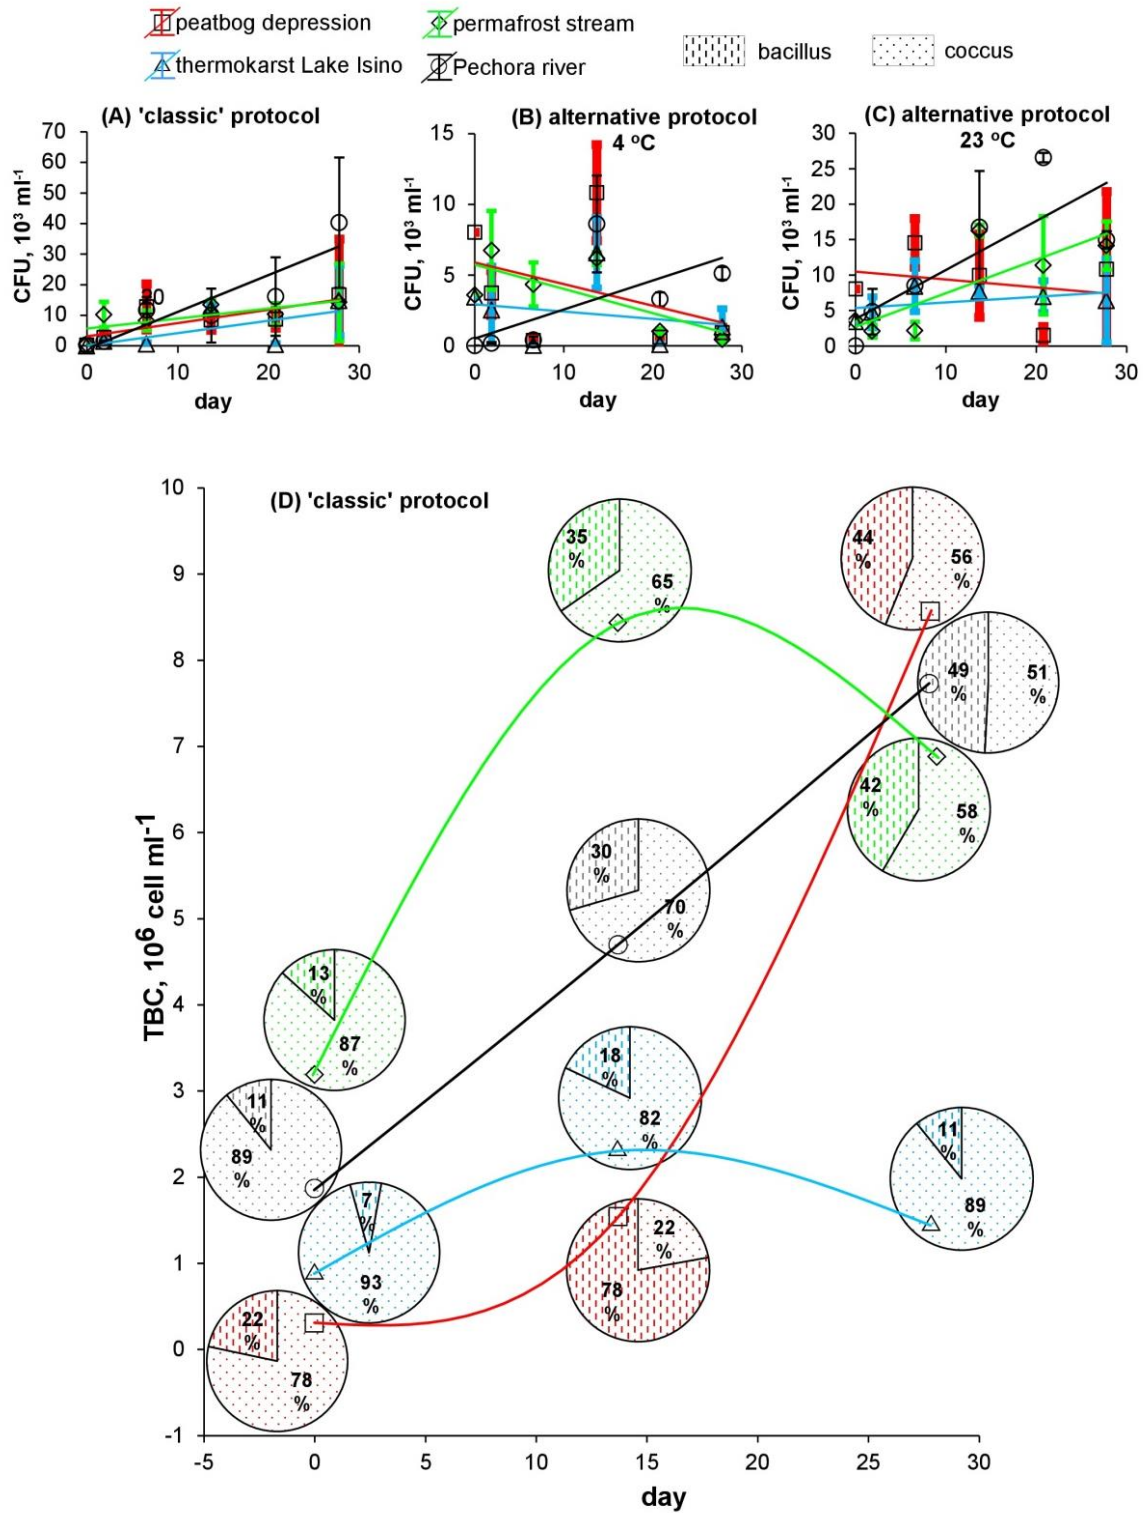

32

33 **Fig. S3.** Number of colony-forming units of oligotrophic bacteria at 23°C in GF/F-filtration  
 34 experiment of 'classic' protocol (A), at 4°C and 23°C in alternative (3 µm – filtration)  
 35 protocol (B and C, respectively), and total bacterial count (DAPI-based) in GF/F-filtration  
 36 experiment (D), where bacterial morphological structure (cocci and rods) is shown. The error  
 37 bars are 1 s.d. of triplicates.

38  
39  
40  
41  
42  
43  
44  
45

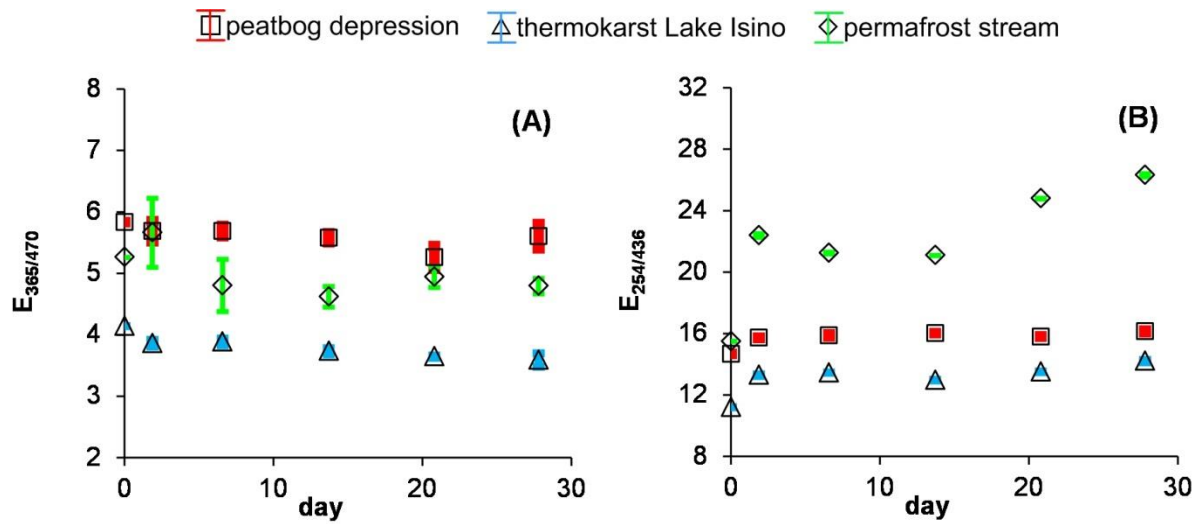

46  
47  
48  
49  
50  
51  
52  
53  
54

**Fig. S4.** The optical properties of DOC during photodegradation experiments:  $E_{365}/E_{470}$  ratio corresponding to UV/vis absorbing functional groups **(A)**, and the  $E_{254}/E_{436}$  ratio, corresponding to autochthonous vs. terrestrial DOM **(B)**. The error bars are 1 s.d. of triplicates.
